# Supplementary material for: Characterization of the Dioscorin Gene Family in Dioscorea alata Reveals a Role in Tuber Development and Environmental Response
Source: PubMed Central journal article supplement (PMC5536067; doi:10.3390/ijms18071579), 2017-07-20
Supplement: ijms-18-01579-s001.pdf [file ijms-18-01579-s001.pdf]

**Supplementary tables:****Table S1.** Amino acid sequence identities among five *Da-dios* genes

|          | Da-dio1 | Da-dio2 | Da-dio3 | Da-dio4 | Da-dio5 | Da-dioA1 | Da-dioA2 | Da-dioA3 | Da-dioB1 |
|----------|---------|---------|---------|---------|---------|----------|----------|----------|----------|
| Da-dio1  | 100     | 68      | 96      | 94      | 68      | 91       | 92       | 86       | 67       |
| Da-dio2  |         | 100     | 68      | 68      | 91      | 69       | 71       | 62       | 97       |
| Da-dio3  |         |         | 100     | 97      | 68      | 94       | 95       | 89       | 66       |
| Da-dio4  |         |         |         | 100     | 68      | 93       | 93       | 87       | 66       |
| Da-dio5  |         |         |         |         | 100     | 68       | 71       | 62       | 90       |
| Da-dioA1 |         |         |         |         |         | 100      | 91       | 87       | 68       |
| Da-dioA2 |         |         |         |         |         |          | 100      | 84       | 71       |
| Da-dioA3 |         |         |         |         |         |          |          | 100      | 61       |
| Da-dioB1 |         |         |         |         |         |          |          |          | 100      |

**Table S2.** Primer sequences used in cDNA amplification and qPCR analysis

| Primer code | Primer sequence                    | Usage              |
|-------------|------------------------------------|--------------------|
| Da-dio1-F   | 5'-TAACAATCATGAGTTCATCCACCC-3'     | cDNA amplification |
| Da-dio1-R   | 5'-TTATACATAGGATGATAGTACATGCAGA-3' |                    |
| Da-dio2-F   | 5'-TAACAATCATGAGTTCATCCACCC-3'     | cDNA amplification |
| Da-dio2-R   | 5'-CCACTCTTTTTATTTAACCATCACC-3'    |                    |
| Da-dio3-F   | 5'-ATTATGGCCGGGACTC-3'             | cDNA amplification |
| Da-dio3-R   | 5'-TTACGTGCTTCCTTAATTATCATA-3'     |                    |
| Da-dio4-F   | 5'-ATTATGGCCGGGACTC-3'             | cDNA amplification |
| Da-dio4-R   | 5'-TTACGTGCTTCCTTAATTATCATA-3'     |                    |
| Da-dio5-F   | 5'-CCGGGACTCCAATCTAAGC-3'          | cDNA amplification |
| Da-dio5-R   | 5'-GCTACATGCAGAGTGGAGCA-3'         |                    |

|                  |                                    |                                 |
|------------------|------------------------------------|---------------------------------|
| Da-dio1-Q-F      | 5'-AGTGCTGACCCATTCCTCTCG-3'        | qPCR analysis (target genes)    |
| Da-dio1-Q-R      | 5'-TCCCAAGTATCTAAAATAAGCAGAGTCA-3' |                                 |
| Da-dio2-Q-F      | 5'-TCCCTCCTCTTCTCTTGCTTTT-3'       |                                 |
| Da-dio2-Q-R      | 5'-CCGTATCACTCTATCATCACACAAAT-3'   |                                 |
| Da-dio3-Q-F      | 5'-GAAATAAATGCAGGAGTTGTGGATA-3'    |                                 |
| Da-dio3-Q-R      | 5'-TCATTCACTGCCTGCTTCAACA-3'       |                                 |
| Da-dio4-Q-F      | 5'-AGCAATAGCCAGAAGAATGAAATC-3'     |                                 |
| Da-dio4-Q-R      | 5'-TGCAACCTTCCTCATGACGG-3'         |                                 |
| Da-dio5-Q-F      | 5'-CCCTCCTCTTCTCTTGCTTATCAT-3'     |                                 |
| Da-dio5-Q-R      | 5'-CGTATCACTCTATCATCACACAAACA-3'   |                                 |
| $\beta$ -Actin-F | 5'-GGGTTACTCATTACCACCACAG-3'       | qPCR analysis (reference genes) |
| $\beta$ -Actin-R | 5'-GGTAACTCATAACTCTTCTCAACAGCA-3'  |                                 |
| Tubulin-F        | 5'-CTTGGCTTTACCATCTATCCTTCC-3'     |                                 |
| Tubulin-R        | 5'-AGTGTGTTCAAGTAAGGAATGGGT-3'     |                                 |

**Table S3.** Primer sequences used for amplification of *Da-dio5* promoter and construction of binary vectors

| Primer code | Primer sequence                                      | Usage                              |
|-------------|------------------------------------------------------|------------------------------------|
| SP1         | 5'-TGAAAATGAATTCGCTTGAGTTGGTACTG-3'                  | Promoter amplification             |
| SP2         | 5'-GAGTCCGTATCACTCTATCATCACACAAACA-3'                |                                    |
| SP3         | 5'-ACACAAACAAATGGGTGACTGCTCCT-3'                     |                                    |
| Da-dio5QI-F | 5'-GCGG <u>GAGCTC</u> AGATCCTTTTTCTGGGCTGGT-3'       | <i>Da-dio5::GUS</i> transformation |
| Da-dio5QI-R | 5'-CATGGG <u>TCTCC</u> CATGGTTGTCTTTCTTAATTTTTTGC-3' |                                    |
| Da-dio5-GF  | 5'-ACAG <u>TGCAC</u> ATGAGTTCATCCACCCTTTTCCAT-3'     | Subcellular localization           |
| Da-dio5-GR  | 5'-ACAG <u>GTA</u> CTATGGCATCATGATTCGATTTTTG-3'      |                                    |

Underlined sequences indicate restriction recognition sites.
